# Supplementary material for: Telomerase activity, relative telomere length, and longevity in alfalfa (Medicago sativa L.)
Source: PeerJ journal article supplement (doi:10.7717/peerj.14102), 2022-10-12
Supplement: Raw_data_.zip [file Raw_data_.zip]

## Sheet: Fig.1
Telomerase activity
	5-year-old
	Thrid leaves			Sixth leaves			Thrid leaves		Sixth leaves		(Thrid VS Sixth )
1	Qingshui	0.547492	0.497351	0.266685	0.26947		Average	SE	Average	SE	Sig.
2	Qingshui	0.488224		0.255677		Qingshui	0.497416	0.01693	0.270156	0.00668369	0.001	*
3	Qingshui	0.476936		0.287763		WL168	0.7346	0.01367	0.495306	0.0263381	0.001	*
4	Qingshui	0.476754		0.267754		RSA-01	0.714856	0.01294	0.474356	0.0109139	0	*
1	WL168	0.717214	0.743579	0.436403	0.496827	RSA-02	0.489924	0.01296	0.383357	0.0156097	0.003	*
2	WL168	0.723603		0.481746		RSA-03	0.594642	0.00765	0.395749	0.0279912	0.006	*
3	WL168	0.760746		0.562754
4	WL168	0.772754		0.506403
1	RSA-01	0.737396	0.714878	0.458333	0.458462
2	RSA-01	0.704673		0.479374
3	RSA-01	0.683046		0.428357
4	RSA-01	0.734396		0.467782
1	RSA-02	0.517352	0.489866	0.4091	0.378952
2	RSA-02	0.455409		0.350009
3	RSA-02	0.488637		0.402637
4	RSA-02	0.498064		0.354064
1	RSA-03	0.605473	0.594551	0.304973	0.382134
2	RSA-03	0.609871		0.439
3	RSA-03	0.58194		0.39494
4	RSA-03	0.580922		0.389622

## Sheet: Fig.2
Telomerase activity
The standard curve
x	0.052	0.187	0.23	0.461	0.923	1.821
y	0	6.25	12.5	25	50	100	U/L
							A	56.3527
							B	-2.21498
							R	0.998639

## Sheet: Fig.3
Telomerase activity
							1-year-old		5-year-old		1a VS 5a
		1-year-old		5-year-old			Average	SE	Average	SE	Sig.
1	Qingshui	0.704141	0.695981	0.547492	0.497351	Qingshui	0.6960 b	0.00695	0.4974 c	0.01693	0.001	*
2	Qingshui	0.696023		0.488224		WL168	0.7776 a	0.01276	0.7336 a	0.01367	0.088
3	Qingshui	0.676371		0.476936		RSA-01	0.4747 c	0.0035	0.7149 a	0.01294	0	*
4	Qingshui	0.707389		0.476754		RSA-02	0.6961 b	0.01814	0.4899 c	0.01296	0.002	*
1	WL168	0.741579	0.777588	0.717214	0.743579	RSA-03	0.5059 c	0.01885	0.5946 b	0.00765	0.013	*
2	WL168	0.793382		0.723603
3	WL168	0.797834		0.760746
4	WL168	0.777557		0.772754
1	RSA-01	0.482031	0.474723	0.737396	0.714878			1-year-old							5-year-old
2	RSA-01	0.477042		0.704673				DunCan		N	Alpha = 0.05				DunCan		N	Alpha = 0.05
3	RSA-01	0.46532		0.683046							1	2	3					1	2	3
4	RSA-01	0.4745		0.734396					RSA-01	4	0.4747					RSA-02	4	0.489875
1	RSA-02	0.678783	0.696135	0.517352	0.489866				RSA-03	4	0.5059					Qingshui	4	0.49735
2	RSA-02	0.687236		0.455409					Qingshui	4		0.696				RSA-03	4		0.59455
3	RSA-02	0.669141		0.488637					RSA-02	4		0.6961				RSA-01	4			0.714875
4	RSA-02	0.749382		0.498064					WL168	4			0.7776			WL168	4			0.7436
1	RSA-03	0.55544	0.505914	0.605473	0.594551				Sig.		0.125	0.994	1			sig.		0.751508	1	0.432363
2	RSA-03	0.492707		0.609871
3	RSA-03	0.465644		0.58194
4	RSA-03	0.509866		0.580922

## Sheet: Fig.5-A
		Telomere(Ct)					Actin(Ct)					△Ct values
1-year-old		Qingshui	WL168	RSA-01	RSA-02	RSA-03	Qingshui	WL168	RSA-01	RSA-02	RSA-03	Qingshui	WL168	RSA-01	RSA-02	RSA-03
	1	12.2396	12.2064	11.6403	11.9419	11.9609	22.3309	22.4857	22.0401	22.0554	22.1427	-10.0913	-10.2793	-10.3997	-10.1136	-10.1818
	2	12.3873	11.9394	11.8271	12.2231	12.1101	22.2817	22.2196	22.322	22.1885	22.3728	-9.89441	-10.2803	-10.4949	-9.96542	-10.2627
	3	12.4964	12.0529	11.8203	12.0103	11.767	22.2534	22.2367	22.3505	22.3116	22.0464	-9.757	-10.1838	-10.5302	-10.3013	-10.2794
	4	12.3664	12.1117	11.8874	11.9478	11.9435	22.1738	22.3054	22.3109	22.2484	22.1634	-9.80745	-10.1938	-10.4235	-10.3006	-10.2199
5-year-old		Qingshui	WL168	RSA-01	RSA-02	RSA-03	Qingshui	WL168	RSA-01	RSA-02	RSA-03	Qingshui	WL168	RSA-01	RSA-02	RSA-03
	1	8.89722	8.4822	8.51091	8.81351	8.87992	22.1132	22.2035	22.08	22.3082	22.593	-13.216	-13.7213	-13.5691	-13.4947	-13.7131
	2	8.76163	8.36737	8.54401	8.82146	8.79833	22.2661	22.0539	22.2276	22.3762	22.6057	-13.5045	-13.6865	-13.6836	-13.5547	-13.8074
	3	8.90554	8.51057	8.45688	8.87066	8.86557	22.3002	22.1573	22.1577	22.4	22.4894	-13.3947	-13.6467	-13.7009	-13.5293	-13.6239
	4	8.89272	8.48025	8.70746	9.41041	8.74089	22.3605	22.3202	22.4104	22.9314	22.5779	-13.4678	-13.84	-13.703	-13.5209	-13.837

## Sheet: Fig.5-B
		△Ct					△Ct-△Ct对照					2^(T/S)
	-9.88754	Qingshui	WL168	RSA-01	RSA-02	RSA-03	Qingshui	WL168	RSA-01	RSA-02	RSA-03	Qingshui	WL168	RSA-01	RSA-02	RSA-03
1-year-old	1	-10.0913	-10.2793	-10.3997	-10.1136	-10.1818	-0.203743	-0.39179	-0.512192	-0.226014	-0.294277	1.15168	1.31202	1.42622	1.1696	1.22627
	2	-9.89441	-10.2803	-10.4949	-9.96542	-10.2627	-0.00687007	-0.392716	-0.607327	-0.0778843	-0.375161	1.00477	1.31286	1.52343	1.05547	1.29698
	3	-9.757	-10.1838	-10.5302	-10.3013	-10.2794	0.130535	-0.296298	-0.642627	-0.41376	-0.391879	0.913492	1.22799	1.56117	1.33215	1.3121
	4	-9.80745	-10.1938	-10.4235	-10.3006	-10.2199	0.0800888	-0.30623	-0.53592	-0.413035	-0.332371	0.945999	1.23647	1.44987	1.33148	1.25908
5-year-old	1	-13.216	-13.7213	-13.5691	-13.4947	-13.7131	-3.32844	-3.83376	-3.68157	-3.60714	-3.82553	10.0453	14.2586	12.8311	12.1859	14.1775
	2	-13.5045	-13.6865	-13.6836	-13.5547	-13.8074	-3.61697	-3.79899	-3.79607	-3.66718	-3.91984	12.2692	13.9191	13.891	12.7037	15.1352
	3	-13.3947	-13.6467	-13.7009	-13.5293	-13.6239	-3.50713	-3.7592	-3.81331	-3.64176	-3.73632	11.3698	13.5405	14.0579	12.4819	13.3274
	4	-13.4678	-13.84	-13.703	-13.5209	-13.837	-3.58028	-3.95244	-3.81544	-3.6334	-3.94944	11.9611	15.4811	14.0787	12.4097	15.4489
DunCan
1-year-old	Qingshui	4	1.004					1-year-old		5-year-old		1a VS 5a
	RSA-02	4		1.2222				Average	SE	Average	SE	Sig.
	WL168	4		1.2723			Qingshui	1.004	0.05273	11.4113	0.49211	**
	RSA-03	4		1.2736			WL168	1.2723	0.02322	14.2998	0.4202	**
	RSA-01	4			1.4902		RSA-01	1.4902	0.03144	13.7147	0.2975	**
5-year-old	Qingshui	4	11.4113				RSA-02	1.2222	0.06745	12.4453	0.10672	**
	RSA-02	4	12.4453				RSA-03	1.2736	0.01932	14.5223	0.48141	**
	RSA-01	4		13.7147
	WL168	4		14.2998
	RSA-03	4		14.5223

## Sheet: Fig.5-C
	2^(T/S)
	Qingshui	WL168	RSA-01	RSA-02	RSA-03
1-year-old	1.15168	1.31202	1.42622	1.1696	1.22627
	1.00477	1.31286	1.52343	1.05547	1.29698
	0.913492	1.22799	1.56117	1.33215	1.3121
	0.945999	1.23647	1.44987	1.33148	1.25908
5-year-old	10.0453	14.2586	12.8311	12.1859	14.1775
	12.2692	13.9191	13.891	12.7037	15.1352
	11.3698	13.5405	14.0579	12.4819	13.3274
	11.9611	15.4811	14.0787	12.4097	15.4489

## Sheet: Fig.5-D
	△Ct values(1-year-old)					△Ct values(5-year-old)					△Ct(5-year-old)-△Ct(1-year-old)					2^(T/S)
1	-10.0913	-10.2793	-10.3997	-10.1136	-10.1818	-13.216	-13.7213	-13.5691	-13.4947	-13.7131	-3.32844	-3.487	-3.10701	-3.32448	-3.47707	10.0453	11.2122	8.61598	10.0177	11.1353
2	-9.89441	-10.2803	-10.4949	-9.96542	-10.2627	-13.5045	-13.6865	-13.6836	-13.5547	-13.8074	-3.61697	-3.45223	-3.22151	-3.38452	-3.57138	12.2692	10.9452	9.32766	10.4434	11.8875
3	-9.757	-10.1838	-10.5302	-10.3013	-10.2794	-13.3947	-13.6467	-13.7009	-13.5293	-13.6239	-3.50713	-3.41244	-3.23875	-3.3591	-3.38786	11.3698	10.6475	9.43978	10.261	10.4676
4	-9.80745	-10.1938	-10.4235	-10.3006	-10.2199	-13.4678	-13.84	-13.703	-13.5209	-13.837	-3.58028	-3.60568	-3.24088	-3.35074	-3.60098	11.9611	12.1736	9.45372	10.2017	12.1339
	-9.88754	-10.2343	-10.4621	-10.1702	-10.236											11.4113	11.2446	9.20928	10.231	11.4061
						Average	SE
					Qingshui	11.4113	0.492109
					WL168	11.2446	0.330423
					RSA-01	9.20928	0.199771
					RSA-02	10.231	0.0877289
					RSA-03	11.4061	0.378112
					DunCan	RSA-01	4	9.2093
						RSA-02	4		10.231
						WL168	4			11.2446
						RSA-03	4			11.4061
						Qingshui	4			11.4113
						Sig		1	1	0.739
